# Supplementary material for: Telomerase reverse transcriptase promotes angiogenesis in neonatal rats after hypoxic-ischemic brain damage
Source: PeerJ journal article supplement (doi:10.7717/peerj.14220), 2022-10-21
Supplement: Supplementary_Material.zip [file Supplementary_Material.zip]

## Sheet: Sheet1
		SUM of IOD	sham	HIBD+vehicle	HIBD+TERT
			66047.4	12600.2	48389.4
			59605.5	25315.3	53880.6
			58768.5	10830.5	33132
		Average value of IOD	0.0326915	0.00623672	0.0239513
			0.0295029	0.0125303	0.0266693
			0.0290887	0.00536077	0.0163994
		AVERAGE	0.0304277	0.00804259	0.02234
		STDEV	0.00197141	0.00391106	0.00532118
